# Supplementary material
Source: PubMed Central journal article supplement (PMC1557932)
Supplement: bmj_333_7566_491__1.pdf [file bmj_333_7566_491__1.pdf]

## 1. Web references

- w1. AD2000 Collaborative Group. Long-term donepezil treatment in 565 patients with Alzheimer's disease (AD2000): randomised double-blind trial. *Lancet* 2000;363:2105-15.
- w2. Akintade L, Zaiac M, Ieni JR, McRae T. AD2000: design and conclusions. *Lancet* 2004;364:1216-7.
- w3. Geldmacher DS, Provenzano G, McRae T, Mastey V, Ieni JR. Donepezil is associated with delayed nursing home placement in patients with Alzheimer's disease. *J Am Geriatr Soc* 2003;51:937-44.
- w4. Finucane TE. Another advertisement for donepezil. *J Am Geriatr Soc* 2004;52:843.
- w5. Royall DR. Donepezil's effects remain uncertain. *J Am Geriatr Soc* 2004;52:843-4.
- w6. National Institute for Health and Clinical Excellence. *Appraisal consultation document: donepezil, galantamine, rivastigmine, and memantine for the treatment of Alzheimer's disease*. London: NICE, 2005.
- w7. Burns A. Alzheimer's disease. *Geriatr Med* 2005;35:30-3.
- w8. National Institute for Health and Clinical Excellence. *Technical report number 2. Donepezil, rivastigmine galantamine (review) and memantine for the treatment of Alzheimer's disease*. London: NICE, 2005.
- w9. National Institute for Health and Clinical Excellence. *Final appraisal determination: donepezil, galantamine, rivastigmine (review) and memantine for the treatment of Alzheimer's disease*. London: NICE, 2006.
- w10. National Institute for Health and Clinical Excellence. *Appraisals committee meeting, 20 December 2005*. [www.nice.org.uk/pdf/TAC\\_201205\\_confirmed.pdf](http://www.nice.org.uk/pdf/TAC_201205_confirmed.pdf) (accessed 16 Aug 2006).
- w11. National Institute of Health and Clinical Excellence. *Alzheimer's disease—main issues from ACD-2 consultation*. London: NICE, 2006.  
[www.nice.org.uk/page.aspx?o=appraisals.inprogress.alzheimersdisease#keydocs](http://www.nice.org.uk/page.aspx?o=appraisals.inprogress.alzheimersdisease#keydocs) (accessed 29 June 2006)
- w12. Byrne A, Curran S, Wattis J. Alzheimer's disease. *Geriatr Med* 2006;36:13-6.
- w13. Grady D. Minimal benefit is seen in drugs for Alzheimer's. *New York Times* 2004 Apr 7.
- w14. National Collaborating Centre for Mental Health. *Dementia: supporting people with dementia and their carers. Draft for consultation*. London: NICE, 2006.  
[www.nice.org.uk/page.aspx?o=319734](http://www.nice.org.uk/page.aspx?o=319734) (accessed 26 June 2006).
